# Supplementary material for: Prospective study on the organization and efficiency of online journal club
Source: Research Square preprint supplement (doi:10.21203/rs.3.rs-2002560/v1), 2022-10-24
Supplement: Supplementary file 2 [file 4aa0267775a67e1a4afa7823.docx]

**Supplementary table: Detailed description of each session.**

| **№ meeting** | **Date** | **Members JC** | **Participants at the meeting** | **Percent of visits, %** | **Lecture** | **Research** | **Format** | **Time (h:mm)** | **Specialty** |
| --- | --- | --- | --- | --- | --- | --- | --- | --- | --- |
| 1 | 11.04.2020 | 19 | 15 | 79 | Evidence-based medicine |  | Lecture | 2:00 | Evidence-based medicine |
| 2 | 11.14.2020 | 19 | 10 | 53 | basic definitions of statistics for reading articles | Wallentin L, Becker RC, Budaj A, Cannon CP, Emanuelsson H, Held C, Horrow J, Husted S, James S, Katus H, Mahaffey KW, Scirica BM, Skene A, Steg PG, Storey RF, Harrington RA; PLATO Investigators, Freij A, Thorsén M. Ticagrelor versus clopidogrel in patients with acute coronary syndromes. N Engl J Med. 2009;361(11):1045-57. doi: 10.1056/NEJMoa0904327. | Discussion | 2:10 | Cardiology |
| 3 | 11.30.2020 | 19 | 8 | 42 | Descriptive statistics | Katelaris PH, Forbes GM, Talley NJ, Crotty B. A randomized comparison of quadruple and triple therapies for Helicobacter pylori eradication: The QUADRATE Study. Gastroenterology. 2002;123(6):1763-9. doi: 10.1053/gast.2002.37051. | Discussion | 2:18 | Gastroenterology |
| 4 | 12.20.2020 | 19 | 10 | 53 | Sampling calculation methods | Nordholm-Carstensen A, Schnack Rasmussen M, Krarup PM. Increased Leak Rates Following Stapled Versus Handsewn Ileocolic Anastomosis in Patients with Right-Sided Colon Cancer: A Nationwide Cohort Study. Dis Colon Rectum. 2019;62(5):542-548. doi: 10.1097/DCR.0000000000001289. | Discussion | 1:58 | Surgery |
| 5 | 12.24.2020 | 16 | 7 | 44 | Phases of clinical trials | Yeh RW, Valsdottir LR, Yeh MW, Shen C, Kramer DB, Strom JB, Secemsky EA, Healy JL, Domeier RM, Kazi DS, Nallamothu BK; PARACHUTE Investigators. Parachute use to prevent death and major trauma when jumping from aircraft: randomized controlled trial. BMJ. 2018;363:k5094. doi: 10.1136/bmj.k5094. | Discussion | 1:57 | Christmas issue |
| 6 | 01.20.2021 | 14 | 6 | 43 | Non-inferiority trial | von Dach E, Albrich WC, Brunel AS, Prendki V, Cuvelier C, Flury D, Gayet-Ageron A, Huttner B, Kohler P, Lemmenmeier E, McCallin S, Rossel A, Harbarth S, Kaiser L, Bochud PY, Huttner A. Effect of C-Reactive Protein-Guided Antibiotic Treatment Duration, 7-Day Treatment, or 14-Day Treatment on 30-Day Clinical Failure Rate in Patients With Uncomplicated Gram-Negative Bacteremia: A Randomized Clinical Trial. JAMA. 2020;323(21):2160-2169. doi: 10.1001/jama.2020.6348. | Report | 2:30 | Infection |
| 7 | 02.03.2021 | 12 | 11 | 92 |  | HALT-IT Trial Collaborators. Effects of a high-dose 24-h infusion of tranexamic acid on death and thromboembolic events in patients with acute gastrointestinal bleeding (HALT-IT): an international randomised, double-blind, placebo-controlled trial. Lancet. 2020;395(10241):1927-1936. doi: 10.1016/S0140-6736(20)30848-5. | Report | 2:56 | Emergency medicine |
| 8 | 02.16.2021 | 12 | 9 | 75 |  | Hague AL, Carr MP. Efficacy of an automated flossing device in different regions of the mouth. J Periodontol. 2007;78(8):1529-37. doi: 10.1902/jop.2007.060512. | Discussion | 2:14 | Dentistry |
| 9 | 03.09.2021 | 33 | 27 | 82 |  | Sauer R, Liersch T, Merkel S, Fietkau R, Hohenberger W, Hess C, Becker H, Raab HR, Villanueva MT, Witzigmann H, Wittekind C, Beissbarth T, Rödel C. Preoperative versus postoperative chemoradiotherapy for locally advanced rectal cancer: results of the German CAO/ARO/AIO-94 randomized phase III trial after a median follow-up of 11 years. J Clin Oncol. 2012;30(16):1926-33. doi: 10.1200/JCO.2011.40.1836. | Discussion | 2:24 | Oncology |
| 10 | 03.18.2021 | 33 | 21 | 64 |  | Tsugawa Y, Jena AB, Figueroa JF, Orav EJ, Blumenthal DM, Jha AK. Comparison of Hospital Mortality and Readmission Rates for Medicare Patients Treated by Male vs Female Physicians. JAMA Intern Med. 2017;177(2):206-213. doi: 10.1001/jamainternmed.2016.7875. | Discussion | 2:06 | Sociology |
| 11 | 03.31.2021 | 33 | 19 | 58 | Medical ethics | Mizoue T, Yoshimura T, Tokui N, Hoshiyama Y, Yatsuya H, Sakata K, Kondo T, Kikuchi S, Toyoshima H, Hayakawa N, Tamakoshi A, Ohno Y, Fujino Y, Kaneko S; Japan Collaborative Cohort Study Group. Prospective study of screening for stomach cancer in Japan. Int J Cancer. 2003;106(1):103-7. doi: 10.1002/ijc.11183. | Discussion | 2:02 | Oncological screening |
| 12 | 05.06.2021 | 33 | 15 | 45 | p-value, "Why most research are false" | Adler L, Duncan E, Angrist B, Hemdal P, Rotrosen J, Slotnick V. Effects of a specific beta 2-receptor blocker in neuroleptic-induced akathisia. Psychiatry Res. 1989 ;27(1):1-4. doi: 10.1016/0165-1781(89)90002-4. | Report | 2:15 | Psychiatry |
| 13 | 05.28.2021 | 33 | 12 | 36 | Protocols for communication with the patient | Okoli C, Van de Velde N, Richman B, Allan B, Castellanos E, Young B, Brough G, Eremin A, Corbelli GM, Mc Britton M, Hardy WD, de Los Rios P. Undetectable equals untransmittable (U = U): awareness and associations with health outcomes among people living with HIV in 25 countries. Sex Transm Infect. 2021;97(1):18-26. doi: 10.1136/sextrans-2020-054551. | Report | 2:28 | Infection |
| 14 | 06.15.2021 | 30 | 8 | 27 |  | Daly RM, Petrass N, Bass S, Nowson CA. The skeletal benefits of calcium- and vitamin D3-fortified milk are sustained in older men after withdrawal of supplementation: an 18-mo follow-up study. Am J Clin Nutr. 2008;87(3):771-7. doi: 10.1093/ajcn/87.3.771. | Discussion | 2:00 | Nutritionology |
| 15 | 07.08.2021 | 26 | 14 | 54 |  | Kamstrup PR, Tybjaerg-Hansen A, Steffensen R, Nordestgaard BG. Genetically elevated lipoprotein(a) and increased risk of myocardial infarction. JAMA. 2009;301(22):2331-9. doi: 10.1001/jama.2009.801. | Discussion | 2:00 | Genetics |
| 16 | 08.08.2021 | 25 | 10 | 40 | Why do you need a journal club, PICO | Lemkes JS, Janssens GN, van der Hoeven NW, van de Ven PM, Marques KMJ, Nap A, van Leeuwen MAH, Appelman YEA, Knaapen P, Verouden NJW, Allaart CP, Brinckman SL, Saraber CE, Plomp KJ, Timmer JR, Kedhi E, Hermanides RS, Meuwissen M, Schaap J, van der Weerdt AP, van Rossum AC, Nijveldt R, van Royen N. Timing of revascularization in patients with transient ST-segment elevation myocardial infarction: a randomized clinical trial. Eur Heart J. 2019;40(3):283-291. doi: 10.1093/eurheartj/ehy651. | Discussion | 2:13 | Cardiology |
| 17 | 09.14.2021 | 25 | 9 | 36 |  | Tilly H, Castaigne S, Bordessoule D, Casassus P, Le Prisé PY, Tertian G, Desablens B, Henry-Amar M, Degos L. Low-dose cytarabine versus intensive chemotherapy in the treatment of acute nonlymphocytic leukemia in the elderly. J Clin Oncol. 1990;8(2):272-9. doi: 10.1200/JCO.1990.8.2.272. | Discussion | 2:00 | Hematology |
| 18 | 10.01.2021 | 15 | 11 | 73 | Descriptive statistics, type I and II errors, p-value | Pala L, Dicembrini I, Mannucci E. Continuous subcutaneous insulin infusion vs modern multiple injection regimens in type 1 diabetes: an updated meta-analysis of randomized clinical trials. Acta Diabetol. 2019;56(9):973-980. doi: 10.1007/s00592-019-01326-5. | Discussion | 2:20 | Endocrinology |
| 19 | 10.14.2021 | 31 | 19 | 61 | Clinical case | Stein GE. Comparison of single-dose fosfomycin and a 7-day course of nitrofurantoin in female patients with uncomplicated urinary tract infection. Clin Ther. 1999;21(11):1864-72. doi: 10.1016/S0149-2918(00)86734-X. | Discussion | 3:00 | Urology |
| 20 | 10.28.2021 | 28 | 18 | 64 |  | Terada K, Muro S, Sato S, Ohara T, Haruna A, Marumo S, Kinose D, Ogawa E, Hoshino Y, Niimi A, Terada T, Mishima M. Impact of gastro-oesophageal reflux disease symptoms on COPD exacerbation. Thorax. 2008;63(11):951-5. doi: 10.1136/thx.2007.092858. | Discussion | 2:50 | Pulmonology |
| 21 | 11.07.2021 | 26 | 16 | 62 | Limitations of evidence-based medicine | Ayeh SK, Abbey EJ, Khalifa BAA, Nudotor RD, Osei AD, Chidambaram V, Osuji N, Khan S, Salia EL, Oduwole MO, Yusuf HE, Lasisi O, Nosakhare E, Karakousis PC. Statins use and COVID-19 outcomes in hospitalized patients. PLoS One. 2021;16(9):e0256899. doi: 10.1371/journal.pone.0256899. | Discussion | 1:53 | Infection |

JC – journal club
